# Supplementary material
Source: Springer Nature journal article supplement (https://www.springermedizin.de/resource/supplementary/12914_2011_218_MOESM1_ESM.pdf/9537030)
Supplement: MOESM1 [file 9537030]

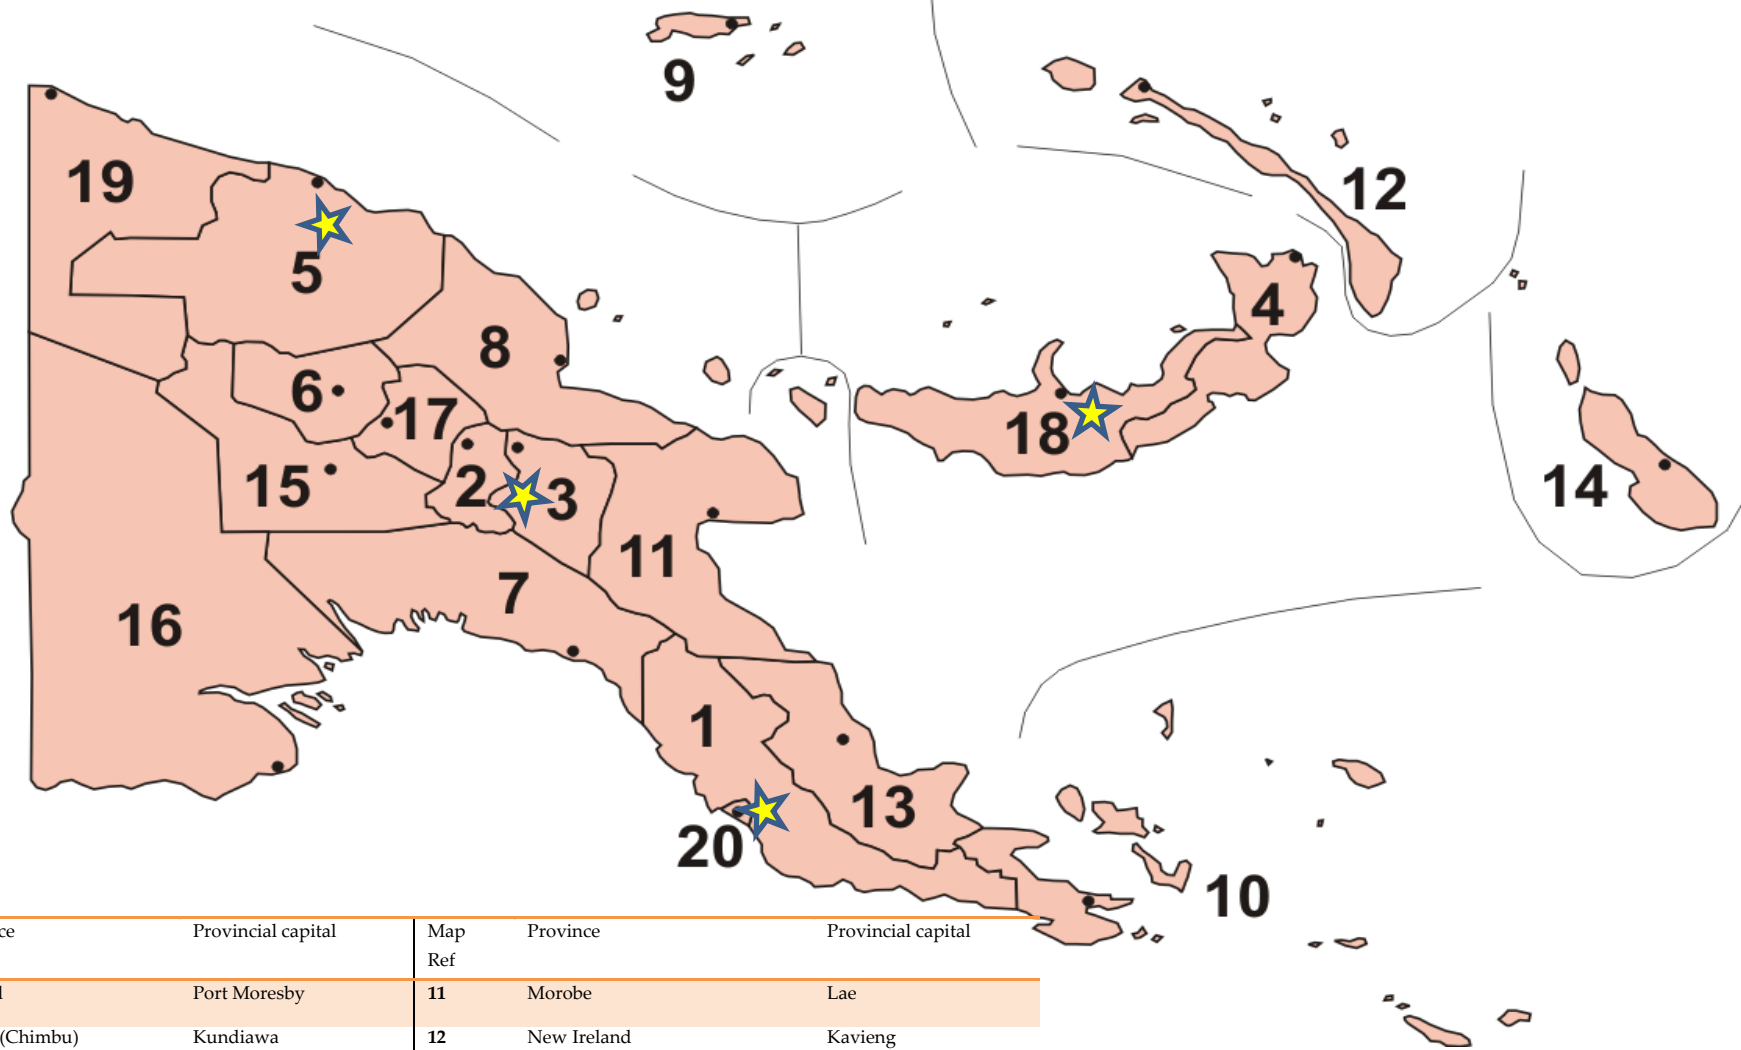

| Map Ref | Province          | Provincial capital | Map Ref | Province                  | Provincial capital |
|---------|-------------------|--------------------|---------|---------------------------|--------------------|
| 1       | Central           | Port Moresby       | 11      | Morobe                    | Lae                |
| 2       | Simbu (Chimbu)    | Kundiawa           | 12      | New Ireland               | Kavieng            |
| 3       | Eastern Highlands | Goroka             | 13      | Oro (Northern)            | Popondetta         |
| 4       | East New Britain  | Kokopo             | 14      | Bougainville              | Arawa              |
| 5       | East Sepik        | Wewak              | 15      | Southern Highlands        | Mendi              |
| 6       | Enga              | Wabag              | 16      | Western (Fly)             | Daru               |
| 7       | Gulf              | Kerema             | 17      | Western Highlands         | Mount Hagen        |
| 8       | Madang            | Madang             | 18      | West New Britain          | Kimbe              |
| 9       | Manus             | Lorengau           | 19      | Sandaun (West Sepik)      | Vanimo             |
| 10      | Milne Bay         | Alotau             | 20      | National Capital District | Port Moresby       |

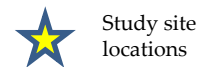

Study site locations
